# Supplementary material for: Liquid Chromatography-Tandem Mass Spectrometry Detection of Human and Veterinary Drugs and Pesticides in Surface Water
Source: Int J Anal Chem. 2023 Oct 16;2023:6350669. doi: 10.1155/2023/6350669 (PMC10593548; doi:10.1155/2023/6350669)
Supplement: Supplementary Materials — Table S1: analyte details. Table S2: geographic information of sampling sites and sampling time. Table S3: recoveries (n = 3), method detection limits, and method quantitation limits of human and veterinary drugs and pesticide residues from surface water. [file 6350669.f1.docx]

**Table S1. Details of the source of purchase of all analytes.**

Analytes Source of the standards analytes Source of the standards

Sulfonamides Sulfacetamide O2si Smart Solutions Macrolides Lincomycin Chem Tek

Sulfapyridine (Charleston, SC, USA) Clindamycin (Worcester, MA, USA)

Suladiazine Oleandomycin

Sulfamethoxazole Erythromycin

Sulfathiazole Leucomycins

Sulfamerazine Josamycin

Sulfisoxazole Spiramycin

Sulfamethizole Tilmicosin

Sulfamethazine Hormones Testosterone

Sulfameter Methytestosterone

Sulfamethoxypyridazine Diethylstilbrstrol

Sulfamonomethoxine Estrone

Sulfachloropyridazine Estradiol

Sulfadimethoxine Estriol

Sulfadimethoxine Neonicotinoids Pymetrozine Manhage Bio-Tech

Sulfaphenazole Flonicamid (Beijing, China)

Organophosphorus Dichlorvos O2si Smart Solutions Nitenpyram

Monocrotophos (Charleston, SC, USA) Thiacloprid

Omethoate Acetamiprid

Methidathion Clothianidin

Parathion-methyl Imidacloprid

Parathion Thiamethoxam

Dimethoate Dinotefuran

Imidaclothiz

**Table S2**. **Geographic information of sampling sites and sampling time.**

Sitesa Cross section Latitude Longitude Sampling Time

(N) (E) （Aug. 11）

HM Dahu 22°48.18′ 113°35.04′ 18:30

JM Nansha 22°44.64′ 113°33.84′ 19:10

HQ Wanqingsha 22°42.00′ 113°29.70′ 17:57

HE Hengmen 22°34.44′ 113°31.14′ 18:32

MD Denglongshan 22°13.74′ 113°23.82′ 18:20

JT Huangjin 22°8.16′ 113°17.16′ 18:25

HT Xipaotai 22°13.32′ 113°7.32′ 18:10

YM Huangyong 22°16.98′ 113°4.5′ 18:00

a The eight runoff outlets are labeled as Humen (HM), Jiaomen (JM), Honqimen (HQ), Hengmen (HE), Modaomen (MD), Jitimen (JT), Hutiaomen (HT), and Yamen (YM).

**Table S3. Recoveries (n=3), method detection limits (MDLs) and method quantitation litmits (MQLs) of human and veterinary drugs and pesticide residues from surface water.**

analytes ISa Surface water (ng/L)

10 50 100 Matrix (%)c MatrixIS(%)d MDLs MQLs

Sulfacetamide Sulfamethoxazole-*d*4 127±9b  99±11 98±7 110±2 103±5 0.42 1.25

Sulfapyridine Sulfamethoxazole-*d*4 119±4 104±9 93±6 104±2 95±6 0.26 0.77

Suladiazine Sulfamethoxazole-*d*4 125±9 107±6 96±8 109±7 101±4 0.50 1.49

Sulfamethoxazole Sulfamethoxazole-*d*4 56±2 60±12 70±8 87±9 94±5 0.41 1.23

Sulfathiazole Sulfamethoxazole-*d*4 104±4 101±4 88±6 108±6 103±4 0.37 1.10

Sulfamerazine Sulfamethoxazole-*d*4 120±6 106±5 94±7 112±6 102±4 0.43 1.30

Sulfisoxazole Sulfamethoxazole-d4 49±1 50±6 54±5 83±9 88±4 0.28 0.85

Sulfamethizole Sulfamethoxazole-d4 100±3 94±3 86±10 110±7 96±5 0.49 1.46

Sulfamethazine Sulfamethoxazole-d4 97±5 90±12 88±8 112±7 98±3 0.22 0.67

Sulfameter Sulfamethoxazole-d4 97±3 87±8 89±8 109±6 103±3 0.22 0.65

Sulfamethoxypyridazine Sulfamethoxazole-d4 114±4 103±5 88±10 110±9 96±5 0.18 0.53

Sulfamonomethoxine Sulfamethoxazole-d4 126±3 115±16 108±10 151±15 110±4 0.47 1.42

Sulfachloropyridazine Sulfamethoxazole-d4 75±3 78±11 81±8 133±4 104±5 0.27 0.80

Sulfadoxine Sulfamethoxazole-d4 52±3 71±11 81±7 88±5 92±4 0.31 0.94

Sulfadimethoxine Sulfamethoxazole-d4 65±1 64±4 66±7 99±7 96±4 0.27 0.81

analytes ISa Surface water (ng/L)

10 50 100 Matrix (%)c MatrixIS(%)d MDLs MQLs

Sulfaphenazole Sulfamethoxazole-*d*4 65±2 70±9 74±3 113±4 104±3 0.30 0.89

Lincomycin Tilmicosin-*d*3 61±7 66±21 67±16 107±4 101±5 0.34 1.01

Clindamycin Tilmicosin-*d*3 59±13 66±12 62±7 105±1 95±3 0.29 0.86

Oleandomycin Tilmicosin-*d*3 51±6 69±3 74±5 96±5 102±3 0.41 1.23

Erythromycin Tilmicosin-*d*3 71±14 64±5 63±4 92±11 95±5 0.62 1.87

Leucomycins Tilmicosin-*d*3 43±7 47±5 49±4 39±11 86±4 0.41 1.23

Josamycin Tilmicosin-*d*3 41±10 47±9 46±6 74±10 89±5 0.25 0.76

Spiramycin Tilmicosin-*d*3 56±4 61±12 58±7 27±13 87±5 1.83 5.49

Tilmicosin Tilmicosin-*d*3 42±12 42±11 46±14 122±4 103±3 0.13 0.40

Dichlorvos Imidacloprid-*d*4 60±1 53±6 44±4 91±9 95±4 0.61 1.83

Monocrotophos Imidacloprid-*d*4 87±4 79±8 73±4 99±4 103±5 0.39 1.18

Omethoate Imidacloprid-*d*4 67±5 71±11 76±9 87±6 86±3 0.20 0.59

Methidathion Imidacloprid-*d*4 63±2 65±8 63±2 96±4 103±2 0.18 0.54

Parathion-methyl Imidacloprid-*d*4 64±1 82±12 80±5 108±4 101±5 0.66 1.98

Parathion Imidacloprid-*d*4 98±7 87±14 80±2 117±9 104±6 0.23 0.70

Dimethoate Imidacloprid-*d*4 62±4 67±6 73±7 53±5 89±4 0.35 1.05

Dinotefuran Imidacloprid-*d*4 66±3 88±4 93±5 106±2 97±3 0.65 1.94

analytes ISa Surface water (ng/L)

10 50 100 Matrix (%)c MatrixIS(%)d MDLs MQLs

Pymetrozine Imidacloprid-*d*4 101±17 86±5 85±10 87±5 96±4 0.48 1.43

Imidaclothiz Imidacloprid-*d*4 72±1 72±4 84±12 108±2 98±3 0.17 0.52

Flonicamid Imidacloprid-*d*4 46±4 52±5 57±9 70±3 86±5 0.38 1.14

Nitenpyram Imidacloprid-*d*4 83±9 73±10 66±2 95±2 96±4 0.69 2.07

Thiacloprid Imidacloprid-*d*4 43±2 47±5 52±7 83±3 86±4 0.17 0.50

Acetamiprid Imidacloprid-*d*4 42±3 47±7 56±7 65±3 85±4 0.27 0.82

Clothianidin Imidacloprid-*d*4 66±1 69±6 66±4 98±9 94±5 0.27 0.81

Imidacloprid Imidacloprid-*d*4 90±1 101±6 89±3 114±9 96±7 0.29 0.88

Thiamethoxam Imidacloprid-*d*4 89±8 90±16 75±3 108±2 89±6 0.68 2.05

Testosterone Tilmicosin-*d*3 84±5 88±2 80±4 100±5 93±4 0.15 0.44

Methytestosterone Tilmicosin-*d*3 87±7 85±2 85±2 104±9 89±7 0.13 0.40

Diethylstilbrstrol Estradiol-*d*2 52±6 51±6 49±2 101±4 96±3 0.29 0.88

Estrone Estradiol-*d*2 83±9 77±6 71±1 101±4 87±2 1.05 3.16

Estradiol Estradiol-*d*2 87±1 83±2 86±4 100±3 89±4 0.53 1.58

Estriol Estradiol-*d*2 66±9 68±13 69±6 107±2 102±4 0.83 2.49

a Internal standards.

b Mean(%)±standard deviation(%).

c <100% means matrix suppression effect, >100% means matrix enhancement effect.

d Matrix effect after adding internal standards.
